# Supplementary material
Source: PubMed Central journal article supplement (PMC8207565)

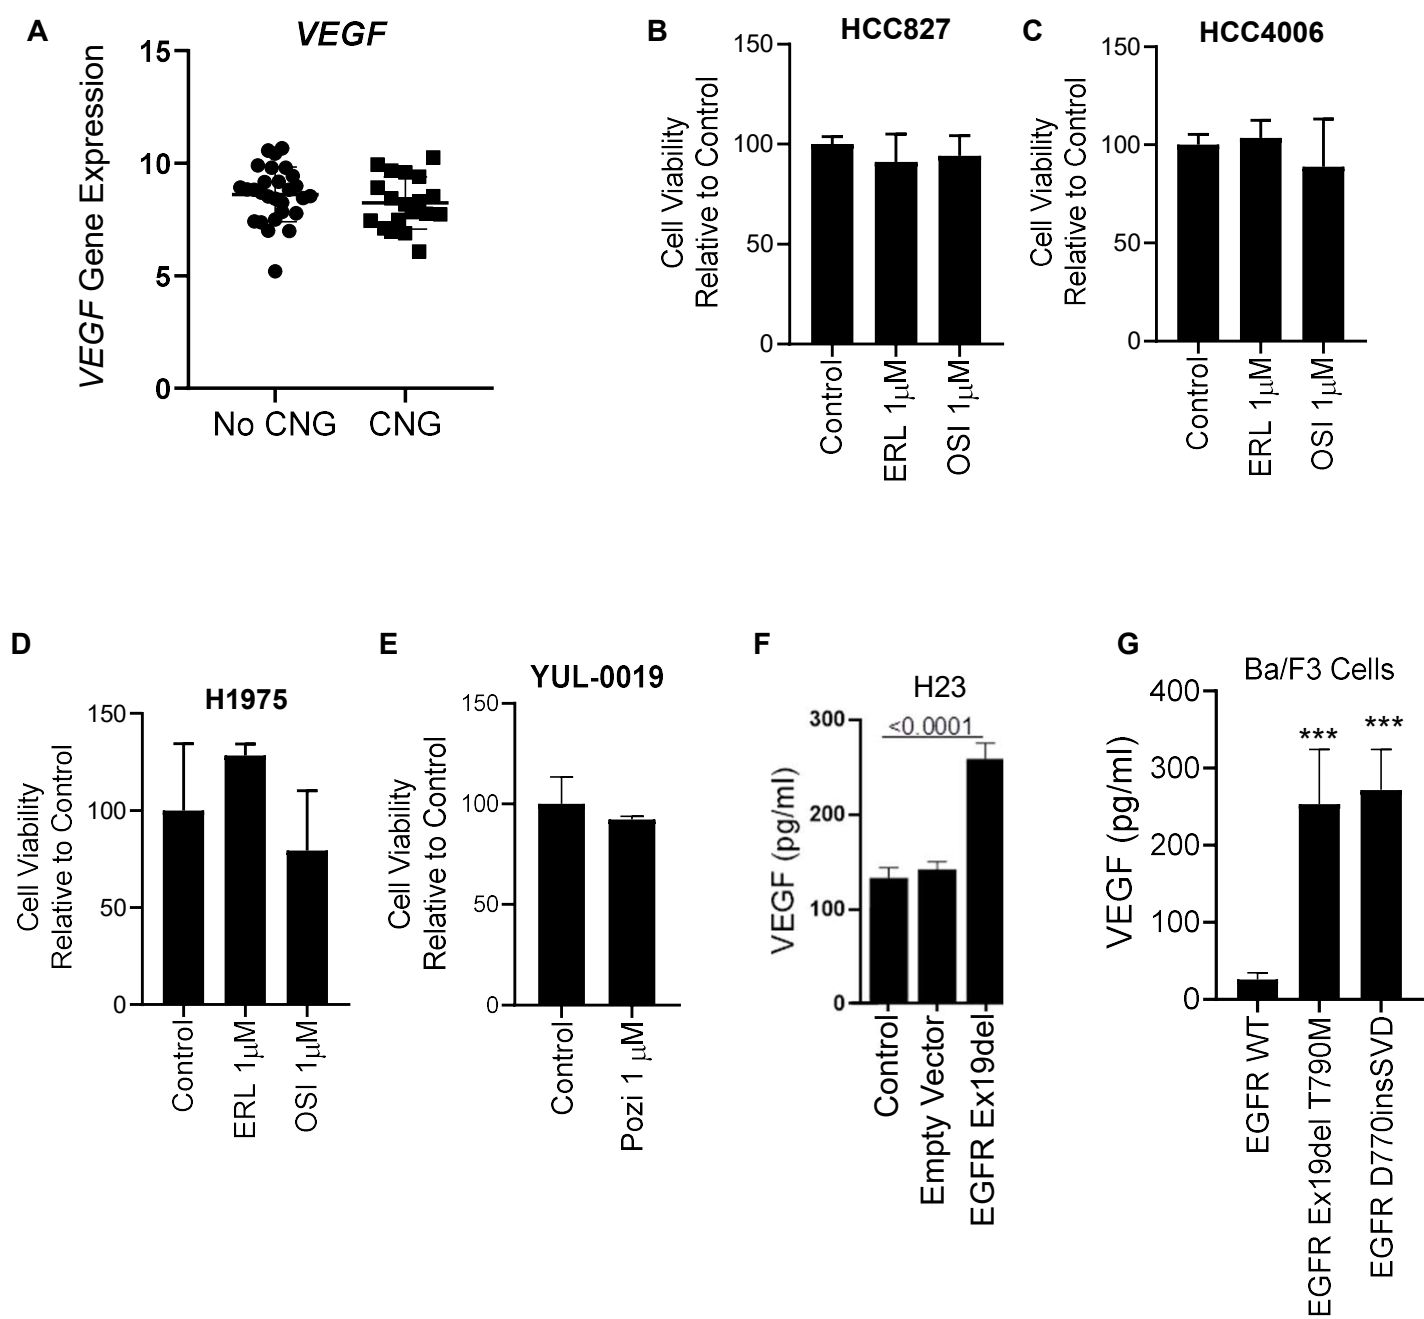

Figure S1

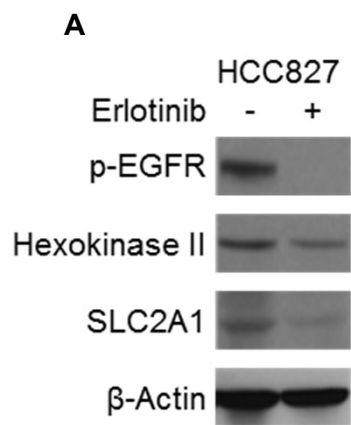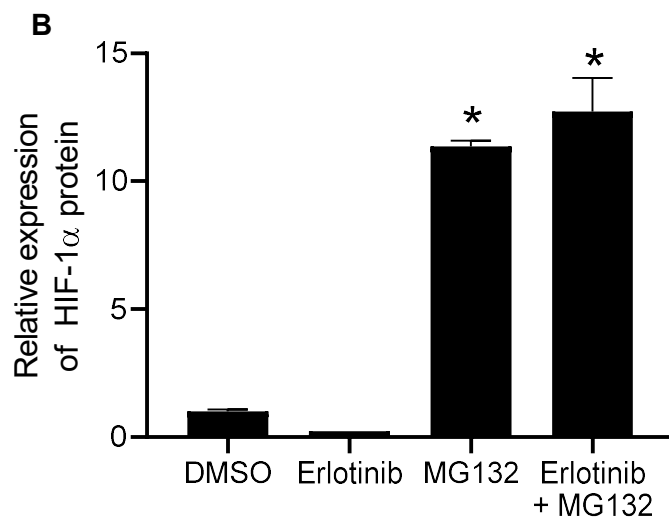

Figure S2

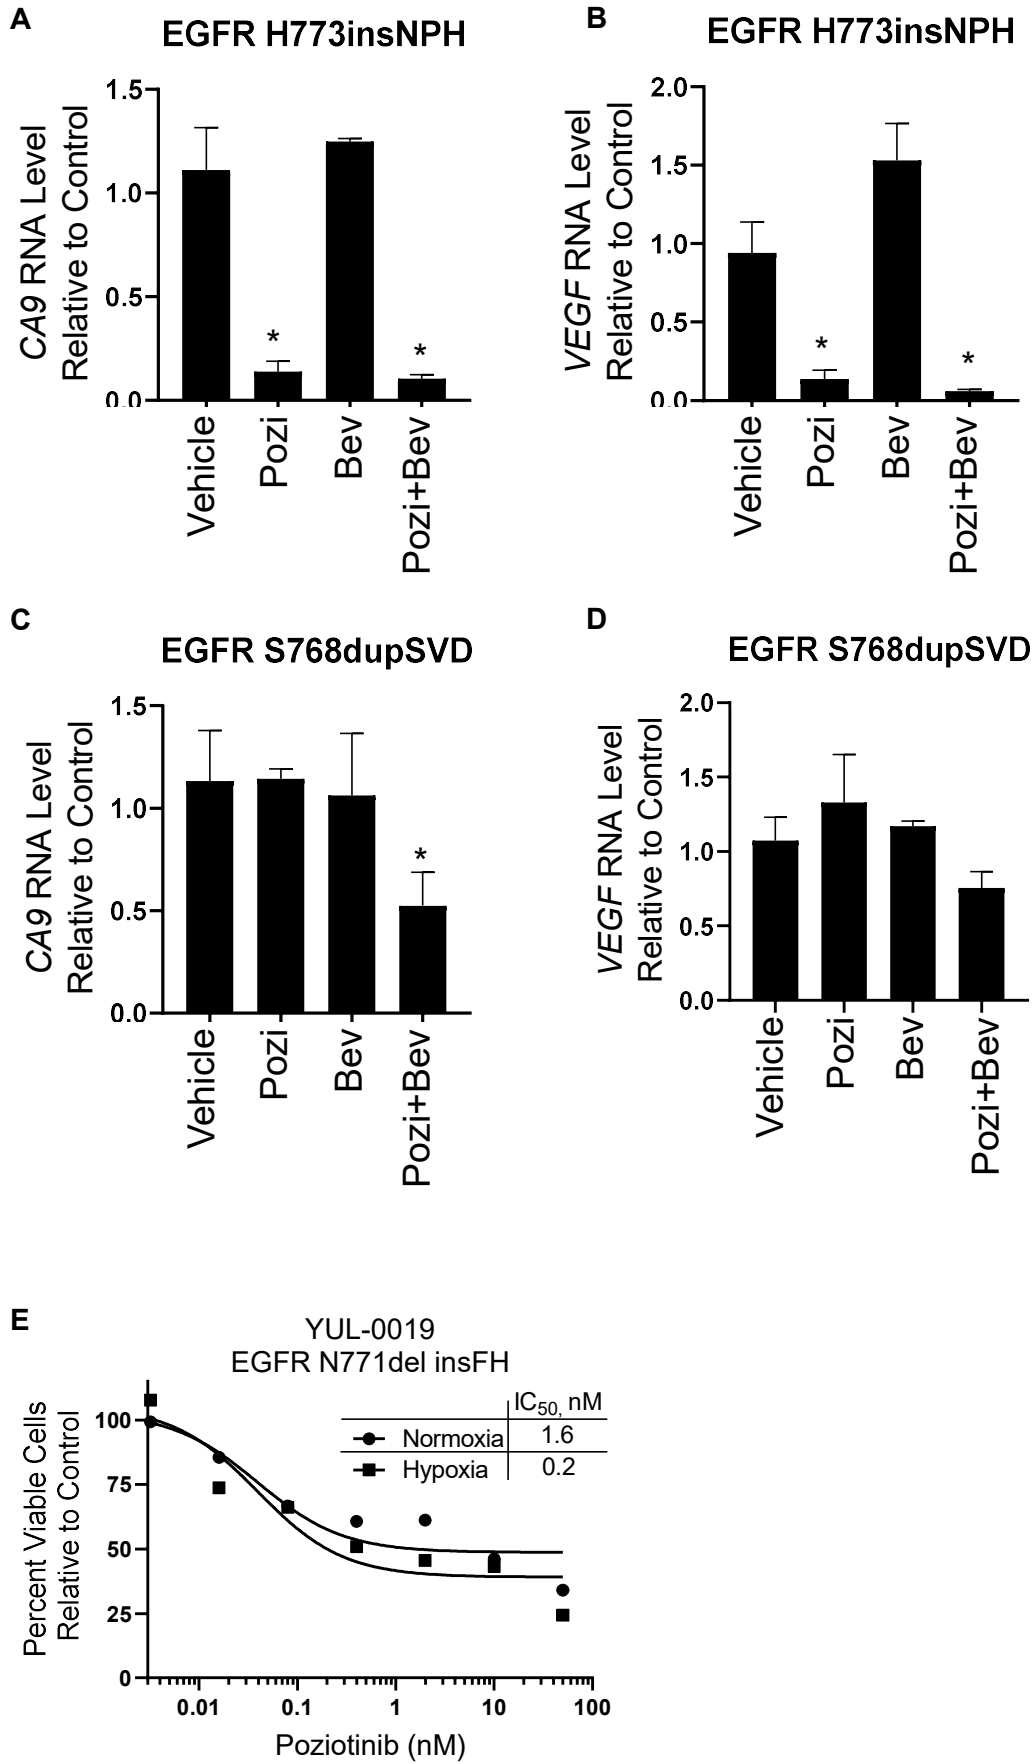

Figure S3

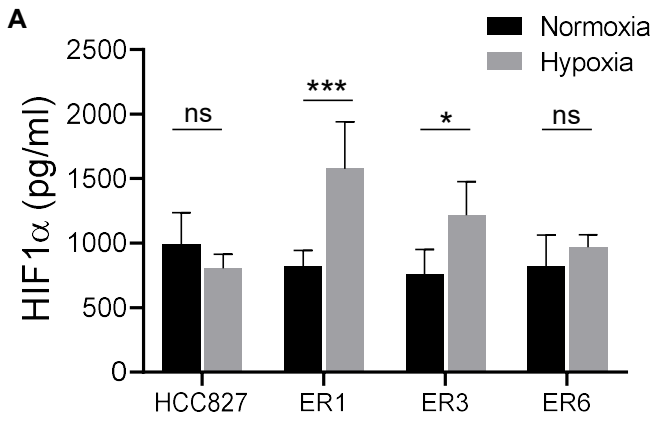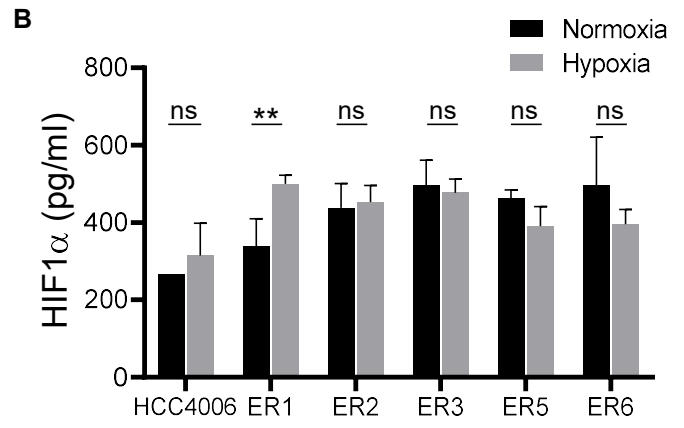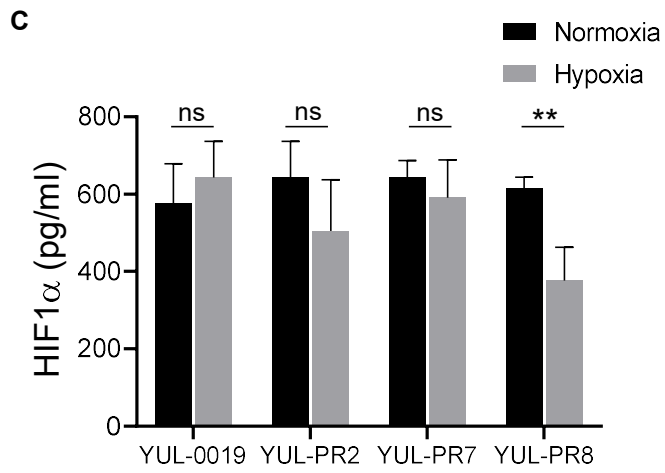

Figure S4

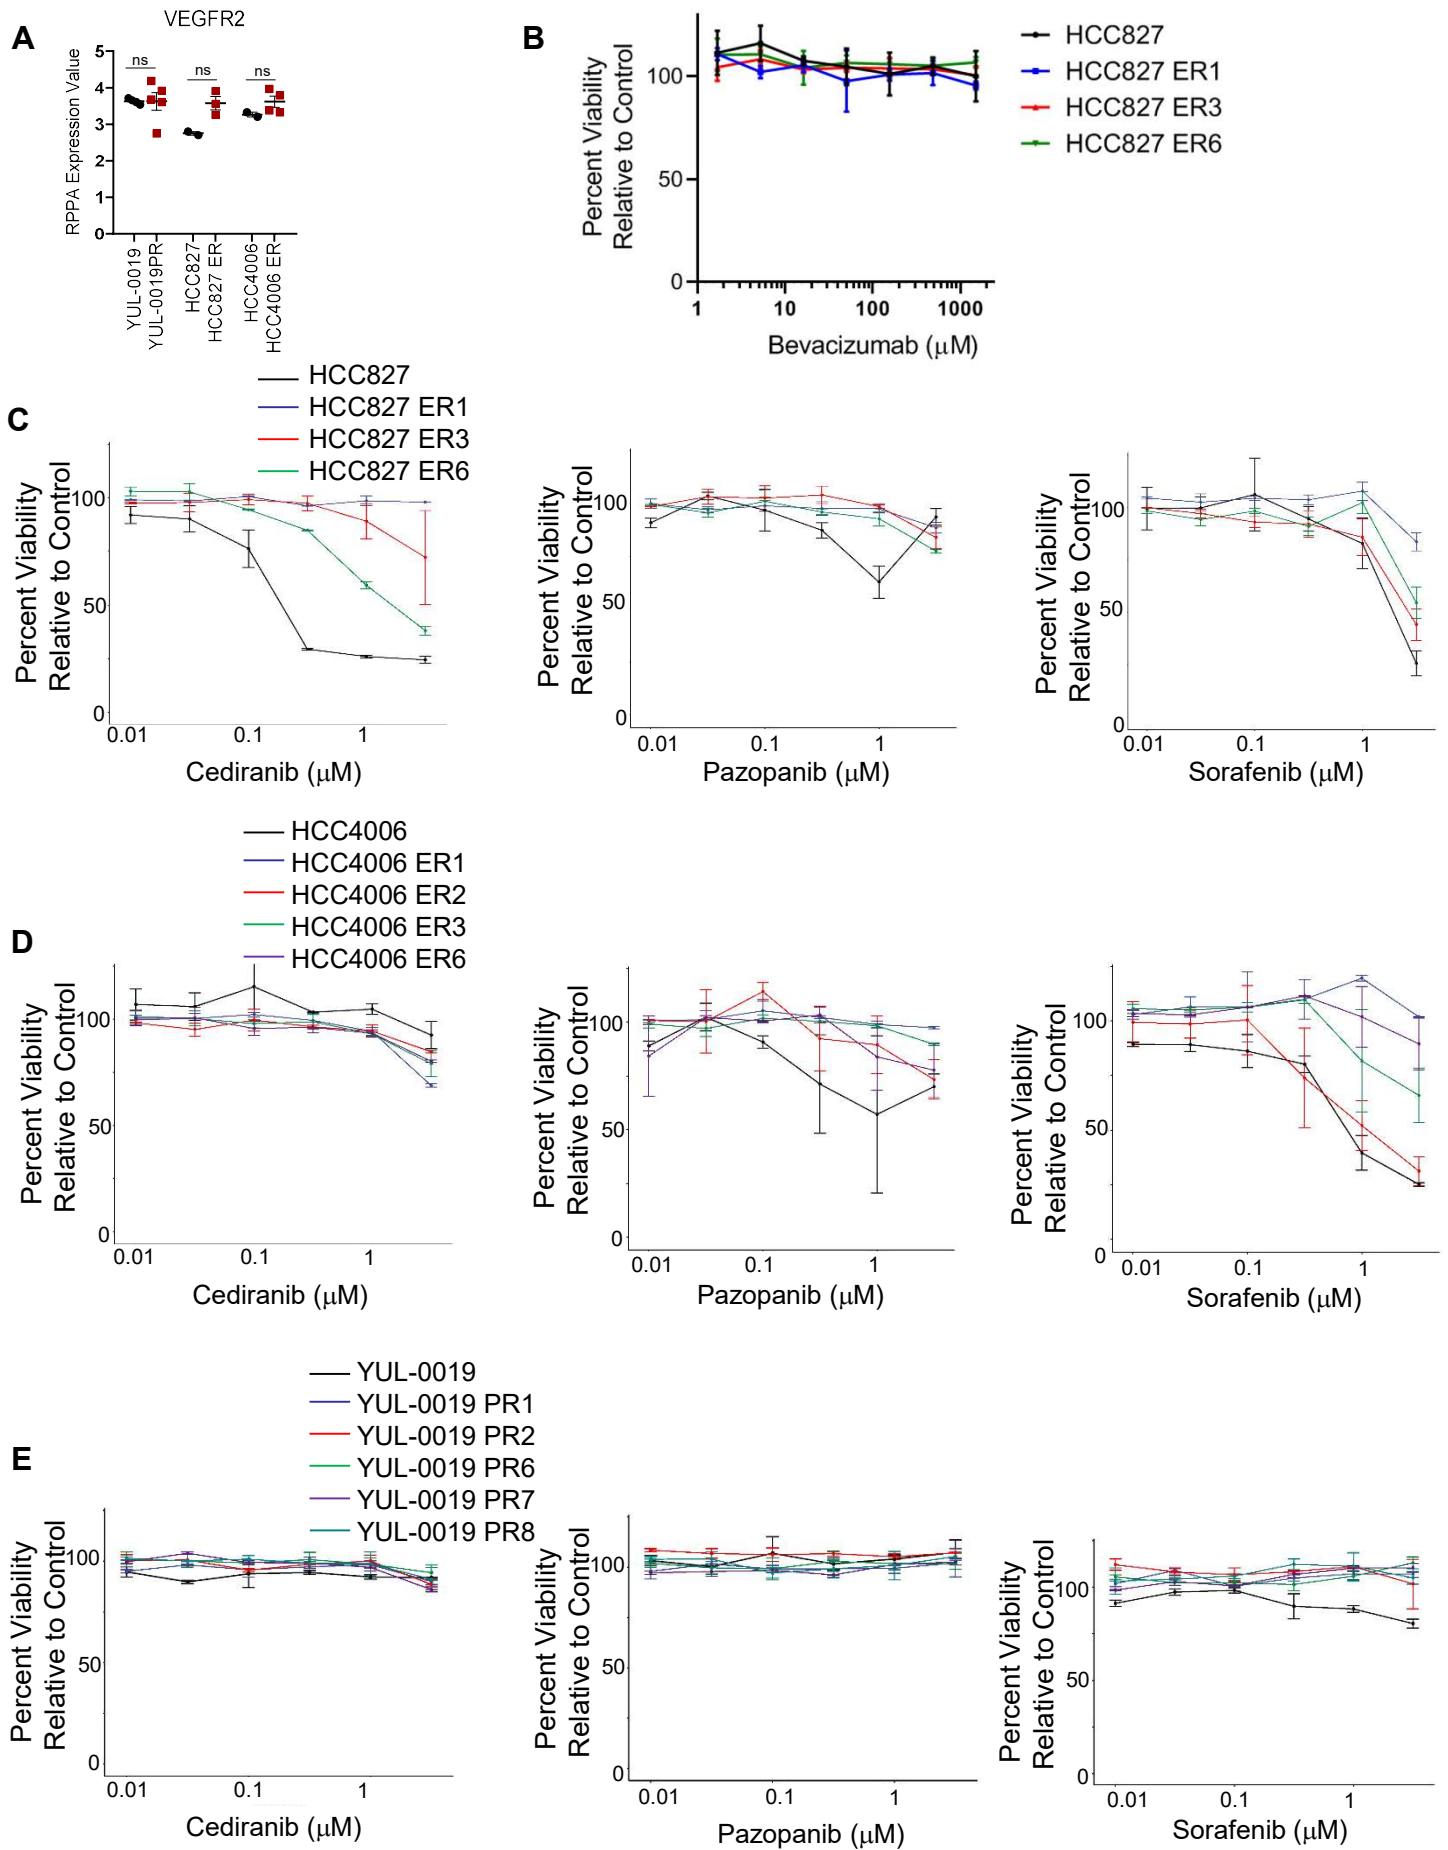

Figure S5

Supplement: NIHMS1708731-supplement-SUPPLEMENTARY.pdf [file NIHMS1708731-supplement-SUPPLEMENTARY.pdf]
